# Supplementary material for: Effectiveness and efficiency of an 11-week exercise intervention for patients with hip or knee osteoarthritis: a protocol for a controlled study in the context of health services research
Source: BMC Public Health. 2016 Apr 30;16:367. doi: 10.1186/s12889-016-3030-0 (PMC4851810; doi:10.1186/s12889-016-3030-0)
Supplement: Additional file 2: — Description knee training. (PDF 96 kb) [file 12889_2016_3030_MOESM2_ESM.pdf]

Additional File 2: Brief description of home training exercises for patients with knee OA.

**Table 1: Description of phase 1 exercises for patients with knee OA (exercises for postural control are not included in the table).**

| Type <sup>1</sup> / No | Exercise       | Position      | M-Plane <sup>2</sup> | RoI <sup>3</sup>  | Muscles                       | Tools <sup>4</sup> |
|------------------------|----------------|---------------|----------------------|-------------------|-------------------------------|--------------------|
| <b>Week 1</b>          |                |               |                      |                   |                               |                    |
| MM1 (K)                | Mobilization   | Supine        | S                    | Knee/Ankle        |                               |                    |
| MM2 (K)                | Mobilization   | Supine        | S                    | Hip/Knee          |                               |                    |
| MM3 (K)                | Stretching     | Supine        | S                    | Ankle             | Calf                          |                    |
| MM4 (H)                | Motor learning | Supine        | C/T                  | Hip               | Adductors                     | EB                 |
| MM5 (H)                | Motor learning | Supine        | S                    | Hip/Knee          | Hip extensors<br>Knee flexors | EB                 |
| MM6 (K)                | Mobilization   | Seated        | S                    | Hip/Knee          |                               |                    |
| MM7 (H)                | Motor learning | Seated        | S                    | Hip               | Core                          |                    |
| MM8 (H)                | Motor learning | Seated        | S                    | Hip/Knee/Ankle    | Hip flexors/Calf              |                    |
| MM9 (K)                | Mobilization   | Seated        | T                    | Knee              |                               |                    |
| MM10 (K)               | Mobilization   | Seated        | S                    | Knee              |                               |                    |
| <b>Week 2</b>          |                |               |                      |                   |                               |                    |
| MM11 (H)               | Motor learning | Seated        | S                    | Contact area foot | Lower extremity               |                    |
| MM12 (H)               | Motor learning | Seated        | T                    | Contact area foot | Lower extremity               |                    |
| MM13 (H)               | Stretching     | Seated        | S                    | Hip/Knee/Ankle    | Hamstrings/Calf               |                    |
| MM14 (H)               | Motor learning | Standing      |                      | Contact area foot | Lower extremity               |                    |
| MM15 (H)               | Motor learning | Standing      | F                    | Contact area foot | Lower extremity               |                    |
| MM16 (H)               | Motor learning | Standing      | F                    | Contact area foot | Lower extremity               |                    |
| MM17 (K)               | Mobilization   | Standing      | S                    | Hip/Knee          |                               | Stick              |
| MM18 (H)               | Motor learning | Standing      | S                    | Hip/Knee/Ankle    | Core<br>Lower extremity       |                    |
| MM19 (H)               | Stretching     | Standing      | S                    | Hip/Knee          | Hip flexors<br>Knee extensors | RB                 |
| MM20 (H)               | Stretching     | Standing      | S                    | Hip/Knee          | Hamstrings/Calf               |                    |
| <b>Week 3</b>          |                |               |                      |                   |                               |                    |
| MM21 (K)               | Motor learning | Supine        | S                    | Hip/Knee          | Extensors                     | EB                 |
| MM22 (K)               | Motor learning | Supine        | S                    | Knee              | Extensors                     |                    |
| MM23 (H)               | Motor learning | Supine        | S                    | Hip/Knee          | Hamstrings                    |                    |
| MM24 (K)               | Stretching     | Supine        | S                    | Hip/Knee          | Hamstrings/Calf               |                    |
| MM25 (K)               | Motor learning | Prone         | S                    | Knee              | Hamstrings                    |                    |
| MM26 (K)               | Motor learning | Prone         | S                    | Hip/Knee          | Lower extremity               |                    |
| MM27 (H)               | Motor learning | Step position |                      | Contact area foot | Lower extremity               |                    |
| MM28 (H)               | Motor learning | Step position |                      | Contact area foot | Lower extremity               |                    |
| MM29 (H)               | Motor learning | Step position |                      | Contact area foot | Lower extremity               |                    |
| MM30 (H)               | Mobilization   | Step position | S                    | Hip/Knee          | Flexors                       |                    |

<sup>1</sup> MM: Motor learning and mobilization | S: Strengthening | H: Hip specific (numbers correspond to exercise book) | K: Knee specific (numbers correspond to additional exercise leaflet)

<sup>2</sup> M-Plane (Movement plane): S: Sagittal plane | F: Coronal plane | T: Transverse plane

<sup>3</sup> RoI: Region of interest

<sup>4</sup> EB: Exercise balls | RB: Elastic rubber bands | WC: Weight cuff

**Table 2: Description of phase 2 exercises for patients with knee OA (exercises for postural control are not included in the table).**

| Type <sup>1</sup> / No                                                                                                                                                                                | Exercise      | Position | M-Plane <sup>2</sup> | RoI <sup>3</sup> | Muscles   | Tools <sup>4</sup> |
|-------------------------------------------------------------------------------------------------------------------------------------------------------------------------------------------------------|---------------|----------|----------------------|------------------|-----------|--------------------|
| <b>Week 4</b>                                                                                                                                                                                         |               |          |                      |                  |           |                    |
| S1 (H)                                                                                                                                                                                                | Strengthening | Supine   | S                    | Hip              | Extensors |                    |
| S2 (H)                                                                                                                                                                                                | Strengthening | Supine   | S                    | Hip              | Flexors   |                    |
| S3 (K)                                                                                                                                                                                                | Strengthening | Prone    | S                    | Knee             | Flexors   |                    |
| S4 (K)                                                                                                                                                                                                | Strengthening | Supine   | S                    | Knee             | Extensors | EB                 |
| <b>Week 5</b>                                                                                                                                                                                         |               |          |                      |                  |           |                    |
| S5 (H)                                                                                                                                                                                                | Strengthening | Standing | S                    | Hip              | Extensors |                    |
| S6 (H)                                                                                                                                                                                                | Strengthening | Seated   | S                    | Hip              | Flexors   |                    |
| S7 (K)                                                                                                                                                                                                | Strengthening | Standing | S                    | Knee             | Flexors   | Sticks             |
| S8 (K)                                                                                                                                                                                                | Strengthening | Seated   | S                    | Knee             | Extensors |                    |
| <b>Week 6</b>                                                                                                                                                                                         |               |          |                      |                  |           |                    |
| First home training session according to week 4, second home training session according to week 5.                                                                                                    |               |          |                      |                  |           |                    |
| <b>Week 7</b>                                                                                                                                                                                         |               |          |                      |                  |           |                    |
| One of the exercises S1-S8 for each muscle group (hip extensors, hip flexors, knee extensors, knee flexors). Type of exercise can be chosen according to personal preferences - 4 exercises in total. |               |          |                      |                  |           |                    |

**Table 3: Description of phase 3 exercises for patients with knee OA (exercises for postural control are not included in the table).**

| Type <sup>1</sup> / No                         | Exercise      | Position | M-Plane <sup>2</sup> | RoI <sup>3</sup> | Muscles   | Tools <sup>4</sup> |
|------------------------------------------------|---------------|----------|----------------------|------------------|-----------|--------------------|
| <b>Week 8-11: First home training session</b>  |               |          |                      |                  |           |                    |
| S11 (K)                                        | Strengthening | Prone    | S                    | Knee             | Flexors   | WC                 |
| S12 (K)                                        | Strengthening | Supine   | S                    | Knee             | Extensors | WC/EB              |
| S13 (K)                                        | Strengthening | Standing | S                    | Knee             | Flexors   | Sticks/<br>WC      |
| S14 (K)                                        | Strengthening | Seated   | S                    | Knee             | Extensors | WC                 |
| <b>Week 8-11: Second home training session</b> |               |          |                      |                  |           |                    |
| S17 (H)                                        | Strengthening | Standing | S                    | Hip              | Extensors | EB                 |
| S18 (H)                                        | Strengthening | Standing | S                    | Hip              | Flexors   | EB                 |
| S19 (K)                                        | Strengthening | Standing | S                    | Knee             | Extensors | Sticks             |
| S20 (K)                                        | Strengthening | Standing | S                    | Hip/Knee         | Extensors | Sticks             |
