# Supplementary material for: Effectiveness and efficiency of an 11-week exercise intervention for patients with hip or knee osteoarthritis: a protocol for a controlled study in the context of health services research
Source: Springer Nature journal article supplement (doi:10.1186/s12889-016-3030-0), 2016-04-30
Supplement: MOESM1 [file 10110978]

Additional File 1: Brief description of home training exercises for patients with hip OA.

**Table 1: Description of phase 1 exercises for patients with hip OA (exercises for postural control are not included in the table).**

| Type <sup>1</sup> / No | Exercise       | Position      | M-Plane <sup>2</sup> | RoI <sup>3</sup>  | Muscles                        | Tools <sup>4</sup> |
|------------------------|----------------|---------------|----------------------|-------------------|--------------------------------|--------------------|
| <b>Week 1</b>          |                |               |                      |                   |                                |                    |
| MM1 (H)                | Mobilization   | Supine        | S                    | Hip/Lumbar spine  |                                |                    |
| MM2 (H)                | Mobilization   | Supine        | S                    | Hip               |                                |                    |
| MM3 (H)                | Mobilization   | Supine        | C/T                  | Hip               |                                |                    |
| MM4 (H)                | Motor learning | Supine        | C/T                  | Hip               | Adductors                      | EB                 |
| MM5 (H)                | Motor learning | Supine        | S                    | Hip/Knee          | Hip extensors<br>Knee flexors  | EB                 |
| MM6 (H)                | Mobilization   | Seated        | S                    | Hip/Lumbar spine  |                                |                    |
| MM7 (H)                | Motor learning | Seated        | S                    | Hip               | Core                           |                    |
| MM8 (H)                | Motor learning | Seated        | S                    | Hip/Knee/Ankle    | Hip flexors/Calf               |                    |
| MM9 (H)                | Mobilization   | Seated        | C/T                  | Hip               |                                |                    |
| MM10 (H)               | Mobilization   | Seated        | T                    | Hip/Lumbar spine  |                                |                    |
| <b>Week 2</b>          |                |               |                      |                   |                                |                    |
| MM11 (H)               | Motor learning | Seated        | S                    | Contact area foot | Lower extremity                |                    |
| MM12 (H)               | Motor learning | Seated        | T                    | Contact area foot | Lower extremity                |                    |
| MM13 (H)               | Stretching     | Seated        | S                    | Hip/Knee/Ankle    | Hamstrings/Calf                |                    |
| MM14 (H)               | Motor learning | Standing      |                      | Contact area foot | Lower extremity                |                    |
| MM15 (H)               | Motor learning | Standing      | F                    | Contact area foot | Lower extremity                |                    |
| MM16 (H)               | Motor learning | Standing      | F                    | Contact area foot | Lower extremity                |                    |
| MM17 (H)               | Stretching     | Standing      | F                    | Hip               | Adductors                      |                    |
| MM18 (H)               | Motor learning | Standing      | S                    | Hip/Knee/Ankle    | Core<br>Lower extremity        |                    |
| MM19 (H)               | Stretching     | Standing      | S                    | Hip/Knee          | Hip flexors<br>Knee extensors  | RB                 |
| MM20 (H)               | Stretching     | Standing      | S                    | Hip/Knee          | Hamstrings/Calf                |                    |
| <b>Week 3</b>          |                |               |                      |                   |                                |                    |
| MM21 (H)               | Mobilization   | Supine        | T                    | Hip               |                                |                    |
| MM22 (H)               | Mobilization   | Supine        | C                    | Hip/Lumbar spine  |                                |                    |
| MM23 (H)               | Motor learning | Supine        | S                    | Hip/Knee          | Hamstrings                     |                    |
| MM24 (H)               | Mobilization   | On the side   | S                    | Hip/Lumbar spine  |                                |                    |
| MM25 (H)               | Motor learning | On the side   | T/C                  | Hip               | External rotators<br>Abductors |                    |
| MM26 (H)               | Motor learning | On the side   | T/C                  | Hip/Knee          | External rotators<br>Abductors |                    |
| MM27 (H)               | Motor learning | Step position |                      | Contact area foot | Lower extremity                |                    |
| MM28 (H)               | Motor learning | Step position |                      | Contact area foot | Lower extremity                |                    |
| MM29 (H)               | Motor learning | Step position |                      | Contact area foot | Lower extremity                |                    |
| MM30 (H)               | Motor learning | Step position | S                    | Hip/Knee          | Flexors                        |                    |

<sup>1</sup> MM: Motor learning and mobilization | S: Strengthening | H: Hip specific (numbers correspond to exercise book)

<sup>2</sup> M-Plane (Movement plane): S: Sagittal plane | F: Coronal plane | T: Transverse plane

<sup>3</sup> RoI: Region of interest

<sup>4</sup> EB: Exercise balls | RB: Elastic rubber bands | WC: Weight cuff

**Table 2: Description of phase 2 exercises for patients with hip OA (exercises for postural control are not included in the table).**

| Type <sup>1</sup> / No                                                                                                                                                                                | Exercise      | Position | M-Plane <sup>2</sup> | RoI <sup>3</sup> | Muscles   | Tools <sup>4</sup> |
|-------------------------------------------------------------------------------------------------------------------------------------------------------------------------------------------------------|---------------|----------|----------------------|------------------|-----------|--------------------|
| <b>Week 4</b>                                                                                                                                                                                         |               |          |                      |                  |           |                    |
| S1 (H)                                                                                                                                                                                                | Strengthening | Supine   | S                    | Hip              | Extensors |                    |
| S2 (H)                                                                                                                                                                                                | Strengthening | Supine   | S                    | Hip              | Flexors   |                    |
| S3 (H)                                                                                                                                                                                                | Strengthening | Supine   | S                    | Hip              | Abductors | RB                 |
| S4 (H)                                                                                                                                                                                                | Strengthening | Supine   | S                    | Hip              | Adductors | EB                 |
| <b>Week 5</b>                                                                                                                                                                                         |               |          |                      |                  |           |                    |
| S5 (H)                                                                                                                                                                                                | Strengthening | Standing | S                    | Hip              | Extensors |                    |
| S6 (H)                                                                                                                                                                                                | Strengthening | Seated   | S                    | Hip              | Flexors   |                    |
| S7 (H)                                                                                                                                                                                                | Strengthening | Seated   | S                    | Hip              | Abductors | RB                 |
| S8 (H)                                                                                                                                                                                                | Strengthening | Seated   | S                    | Hip              | Adductors | EB                 |
| <b>Week 6</b>                                                                                                                                                                                         |               |          |                      |                  |           |                    |
| First home training session according to week 4, second home training session according to week 5.                                                                                                    |               |          |                      |                  |           |                    |
| <b>Week 7</b>                                                                                                                                                                                         |               |          |                      |                  |           |                    |
| One of the exercises S1-S8 for each muscle group (hip extensors, hip flexors, hip abductors, hip adductors). Type of exercise can be chosen according to personal preferences - 4 exercises in total. |               |          |                      |                  |           |                    |

**Table 3: Description of phase 3 exercises for patients with hip OA (exercises for postural control are not included in the table).**

| Type <sup>1</sup> / No                         | Exercise      | Position         | M-Plane <sup>2</sup> | RoI <sup>3</sup> | Muscles   | Tools <sup>4</sup> |
|------------------------------------------------|---------------|------------------|----------------------|------------------|-----------|--------------------|
| <b>Week 8-11: First home training session</b>  |               |                  |                      |                  |           |                    |
| S9 (H) or S13 (H)                              | Strengthening | Supine or Stand  | S                    | Hip              | Extensors | WC                 |
| S10 (H) or S14 (H)                             | Strengthening | Supine or Seated | S                    | Hip              | Flexors   | WC<br>WC           |
| S11 (H) or S15 (H)                             | Strengthening | Supine or Seated | S                    | Hip              | Abductors | RB<br>RB           |
| S12 (H) or S16 (H)                             | Strengthening | Supine or Seated | S                    | Hip              | Adductors | EB<br>EB           |
| <b>Week 8-11: Second home training session</b> |               |                  |                      |                  |           |                    |
| S17 (H)                                        | Strengthening | Standing         | S                    | Hip              | Extensors | EB                 |
| S18 (H)                                        | Strengthening | Standing         | S                    | Hip              | Flexors   | EB                 |
| S19 (H)                                        | Strengthening | Standing         | S                    | Hip              | Abductors | EB                 |
| S20 (H)                                        | Strengthening | Standing         | S                    | Hip              | Adductors | EB                 |
